# Supplementary material for: Replication and Functional Prediction of Two GWAS-Reported SNPs Located on RAD50 Gene Associated with Asthma in Pakistani Children
Source: Research Square preprint supplement (doi:10.21203/rs.3.rs-7456490/v1), 2025-09-17
Supplement: Supplementary file 1 [file 31a8f4d826cfb7a8fe16a380.docx]

Supplementary Table 2: The list of SNVs (Synergistic partner/proxy SNVs) in LD to rs6871536 in Punjabi population of Lahore, Pakistan (1000GENOMES:phase_3:PJL).

| **Sr.**  **no.** | **Chr. Position** | **SNP ID** | **LD in “PJL”** | **Sequence Consequence** | **Motifs Changed** | **Function of motifs** |
| --- | --- | --- | --- | --- | --- | --- |
|
| **1.** | 5:132625375 | rs6873732 |  | Intron Variant | E2F,  Egr-1,  Mtf1, YY1 | **E2F [**inflammation and immune regulation] [1](#_ENREF_1)  **Egr [**anti-inflammatory and immune regulators] [2](#_ENREF_2) |
| **2.** | 5:132625457 | rs6874184 | 1 | Intron Variant | N/A | N/A |
| **3.** | 5:132626157 | rs62383757 | 1 | Intron Variant | Zfp161 | **Zfp** [inflammation] [3](#_ENREF_3) |
| **4.** | 5:132626278 | rs62383758 | 1 | Intron Variant | Hoxb3 | - |
| **5.** | 5:132629417 | rs3798135 | 1 | Intron Variant | NRSF,TFIIA | **-** |
| **6.** | 5:132629487 | rs3798134 | 1 | Intron Variant | - | **-** |
| **7.** | 5:132629914 | rs56183820 | 1 | Intron Variant | CEBPB | - |
| **8.** | 5:132631281 | rs6873897 | 1 | Intron Variant | RREB-1 | **RREB-1 [**transcriptional repressor of HLA-G] [4](#_ENREF_4)) |
| **9.** | 5:132631296 | rs12332204 | 1 | Intron Variant | Mef2,  Fox, | **Mef2 [**inflammation and immune regulation] [5](#_ENREF_5) |
| **10.** | 5:132632917 | rs6596087 | 1 | Intron Variant | Evi-1,  RFX5 | **Evi-1** [regulate NF-κB-dependent inflammation] [6](#_ENREF_6) |
| **11** | 5:132633253 | rs6866095 | 1 | Intron Variant |  |  |
| **12** | 5:132633587 | rs10052993 | 1 | Intron Variant |  |  |
| **13** | 5:132636210 | rs12653750 | 1 | Intron Variant | FXR | **FXR** (immune regulation [7](#_ENREF_7) |
| **14** | 5:132636566 | rs2040703 | 1 | Intron Variant | HDAC2, | **HDAC2** [regulation of inflammatory genes] [8](#_ENREF_8) |
| **15** | 5:132637485 | rs2040704 | 0.975 | Intron Variant | GATA |  |
| **16** | 5:132637513-132637522 | rs11420290 | 1 | Intron Variant |  |  |
| **17** | 5:132637530-132637541 | rs377716981 | 1 | Intron Variant |  |  |
| **18** | 5:132637690 | rs6872131 | 1 | Intron Variant | ZEB1 | **ZEB1** [asthma] [9](#_ENREF_9) |
| **19** | 5:132637971 | rs2074369 | 1 | Intron Variant |  |  |
| **20** | 5:132638371 | rs7737470 | 1 | Intron Variant | Arid5a,Mef2 | **Arid5a** [asthma and inflammation] [10](#_ENREF_10) |
| **21** | 5:132638486-132638488 | rs11308531 | 1 | Intron Variant | Myb, Myc | **Myb, Myc (**asthmatic inflammatory response [11](#_ENREF_11) |

References:

1 Zhang, R., Wang, L., Pan, J.-h. & Han, J. A critical role of E2F transcription factor 2 in proinflammatory cytokines-dependent proliferation and invasiveness of fibroblast-like synoviocytes in rheumatoid Arthritis. *Scientific Reports* **8**, 2623, doi:10.1038/s41598-018-20782-7 (2018).

2 Taefehshokr, S., Key, Y. A., Khakpour, M., Dadebighlu, P. & Oveisi, A. Early growth response 2 and Egr3 are unique regulators in immune system. *Cent Eur J Immunol* **42**, 205-209, doi:10.5114/ceji.2017.69363 (2017).

3 Jin, W.-J. *et al.* Downregulation of the AU-rich RNA-binding protein ZFP36 in chronic HBV patients: implications for anti-inflammatory therapy. *PloS one* **7**, e33356-e33356, doi:10.1371/journal.pone.0033356 (2012).

4 Flajollet, S., Poras, I., Carosella, E. D. & Moreau, P. RREB-1 is a transcriptional repressor of HLA-G. *J Immunol* **183**, 6948-6959, doi:10.4049/jimmunol.0902053 (2009).

5 Chen, X., Gao, B., Ponnusamy, M., Lin, Z. & Liu, J. MEF2 signaling and human diseases. *Oncotarget* **8** (2017).

6 Xu, X. *et al.* EVI1 acts as an inducible negative-feedback regulator of NF-kappaB by inhibiting p65 acetylation. *J Immunol* **188**, 6371-6380, doi:10.4049/jimmunol.1103527 (2012).

7 Renga, B. *et al.* The bile acid sensor FXR is required for immune-regulatory activities of TLR-9 in intestinal inflammation. *PloS one* **8**, e54472-e54472, doi:10.1371/journal.pone.0054472 (2013).

8 Fang, W.-F. *et al.* Histone deacetylase 2 (HDAC2) attenuates lipopolysaccharide (LPS)-induced inflammation by regulating PAI-1 expression. *Journal of Inflammation* **15**, 3, doi:10.1186/s12950-018-0179-6 (2018).

9 Yang, J., Tian, B. & Brasier, A. R. in *Advances in Protein Chemistry and Structural Biology* Vol. 107 (ed Rossen Donev) 1-36 (Academic Press, 2017).

10 Dubey, P. K. *et al.* Arid5a-deficient mice are highly resistant to bleomycin-induced lung injury. *International Immunology* **29**, 79-85, doi:10.1093/intimm/dxx004 (2017).

11 Binia, A. *et al.* A polymorphism affecting MYB binding within the promoter of the PDCD4 gene is associated with severe asthma in children. *Hum Mutat* **34**, 1131-1139, doi:10.1002/humu.22340 (2013).
