# Supplementary material for: Replication and Functional Prediction of Two GWAS-Reported SNPs Located on RAD50 Gene Associated with Asthma in Pakistani Children
Source: Research Square preprint supplement (doi:10.21203/rs.3.rs-7456490/v1), 2025-09-17
Supplement: Supplementary file 2 [file 938e908d3a8e37084b002dc0.docx]

Supplementary Table 1: The list of SNVs (Synergistic partner/proxy SNVs) in LD to rs2244012 in Punjabi population of Lahore, Pakistan (1000GENOMES:phase_3:PJL).

| **Sr. no.** | **Chr. Position** | **dbSNP ID** | **LD in “PJ L”** | **Sequence Consequence** | **Motifs Changed** | **Function of motifs** |
| --- | --- | --- | --- | --- | --- | --- |
|
| **1.** | 5:132559819 | rs10079653 | 1 | Intron Variant | Pax-5,  Zfp187, Zfp691 | **Pax-5 [**asthma pathogenesis**]** [1](#_ENREF_1)  **Zfp** [anti-inflammatory] [2](#_ENREF_2) |
| **2.** | 5:132564905 | rs62383710 | 1 | Intron Variant | N/A | N/A |
| **3.** | 5:132565293-132565302 | rs34776903 | 0.974 | Intron Variant | N/A | N/A |
| **4.** | 5:132568236 | rs2706345 | 1 | Intron Variant | Foxa, Foxd3, Foxp1,  Hoxa4,  p53 | **Fox** [T and B lymphocytes regulation, inflammation] [3](#_ENREF_3)  **P53** [anti-inflammatory] [4](#_ENREF_4) |
| **5.** | 5:132568554 | rs2243677 | 1 | Intron Variant | STAT,  Sox | **STAT [**pro and anti-inflammatory] [5](#_ENREF_5),[6](#_ENREF_6)  **Sox** (inflammation [7](#_ENREF_7) |
| **6.** | 5:132565293-132565302 | rs2706347 | 1 | Intron Variant | RAR,  RORalpha1,  RXRA | **RAR [**inflammation] [8](#_ENREF_8)  **RORalpha1** [anti-inflammatory] [9](#_ENREF_9) |
| **7.** | 5:132570118 | rs2706348 | 1 | Intron Variant | N/A | N/A |
| **8.** | 5:132571068 | rs2706349 | 1 | Intron Variant | Isl2 | **ISL-2 [**arterial cell development] [10](#_ENREF_10) |
| **9.** | 5:132571498 | rs56668723 | 1 | Intron Variant | ZEB1 | **ZEB1** [anti-inflammatory] [11](#_ENREF_11) |
| **10.** | 5:132574103 | rs62383714 | 1 | Intron Variant | BDP1 | **BDP1 [**allergic inflammation] [12](#_ENREF_12) |

References:

1 Mineev, V. *et al.* (Eur Respiratory Soc, 2012).

2 Jin, W.-J. *et al.* Downregulation of the AU-rich RNA-binding protein ZFP36 in chronic HBV patients: implications for anti-inflammatory therapy. *PloS one* **7**, e33356-e33356, doi:10.1371/journal.pone.0033356 (2012).

3 Peng, S. L. Forkhead transcription factors in chronic inflammation. *Int J Biochem Cell Biol* **42**, 482-485, doi:10.1016/j.biocel.2009.10.013 (2010).

4 Uehara, I. & Tanaka, N. Role of p53 in the Regulation of the Inflammatory Tumor Microenvironment and Tumor Suppression. *Cancers (Basel)* **10**, 219, doi:10.3390/cancers10070219 (2018).

5 Pfitzner, E., Kliem, S., Baus, D. & Litterst, C. M. The role of STATs in inflammation and inflammatory diseases. *Current pharmaceutical design* **10**, 2839-2850, doi:10.2174/1381612043383638 (2004).

6 Naeem, F., Sabar, M. F., Ghani, M. U., Ain, Q. & Zafar, Q. U. A. Identification of Diagnostic and Therapeutic Target Genes to Address Asthma Disease in Pakistan. *Chest* **157**, A213, doi:10.1016/j.chest.2020.05.239 (2020).

7 Bhattaram, P., Muschler, G., Wixler, V. & Lefebvre, V. Inflammatory Cytokines Stabilize SOXC Transcription Factors to Mediate the Transformation of Fibroblast-Like Synoviocytes in Arthritic Disease. *Arthritis Rheumatol* **70**, 371-382, doi:10.1002/art.40386 (2018).

8 Zisakis, A., Cd, K., Ad, V., Karachalios, T. & Li, S. Expression of Retinoic Acid Receptor (RAR) α Protein in the Synovial Membrane from Patients with Osteoarthritis and Rheumatoid Arthritis. *International journal of biomedical science: IJBS* **3**, 46 (2007).

9 Delerive, P. *et al.* The orphan nuclear receptor ROR alpha is a negative regulator of the inflammatory response. *EMBO Rep* **2**, 42-48, doi:10.1093/embo-reports/kve007 (2001).

10 Bu, L. *et al.* Human ISL1 heart progenitors generate diverse multipotent cardiovascular cell lineages. *Nature* **460**, 113-117, doi:10.1038/nature08191 (2009).

11 Smita, S. *et al.* Importance of EMT Factor ZEB1 in cDC1 “MutuDC Line” Mediated Induction of Th1 Immune Response. *Frontiers in Immunology* **9**, doi:10.3389/fimmu.2018.02604 (2018).

12 Miyake, K. & Karasuyama, H. Emerging roles of basophils in allergic inflammation. *Allergology International* **66**, 382-391, doi:https://doi.org/10.1016/j.alit.2017.04.007 (2017).
